# Supplementary material
Source: PubMed Central journal article supplement (PMC3977255)
Supplement: 1314972111_sd02.pdf [file 1314972111_sd02.pdf]

**Dataset S2:** Ecological estimate of population size for adult *Dinornis robustus* (South Island), based on environmental regions identified by Leathwick et al. (2002; 2003) and carrying capacities as used by Anderson (1989) and Holdaway & Jacomb (2000)

| Region | Subregion | 1, hills<br>2, steep<br>mountains | Area<br>(km <sup>2</sup> ) | Biomass kg<br>km <sup>-2</sup><br>by habitat<br>quality<br>and terrain | Area per<br>200 kg<br>female<br>(km) | No.<br>females | Area per<br>100 kg<br>male | No.<br>males | Total<br>territories | Running<br>total<br>(adults) |
|--------|-----------|-----------------------------------|----------------------------|------------------------------------------------------------------------|--------------------------------------|----------------|----------------------------|--------------|----------------------|------------------------------|
| B1     | B1.1      |                                   | 100                        | 2.5                                                                    | 80.0                                 | 1.3            | 40.0                       | 1.1          | 2                    |                              |
|        | B1.2      |                                   | 147.88                     | 2.5                                                                    | 80.0                                 | 1.8            | 40.0                       | 1.7          | 4                    | 6                            |
| B3     | B3.1      |                                   | 1031.12                    | 9.1                                                                    | 22.0                                 | 46.9           | 11.0                       | 42.7         | 90                   | 95                           |
|        | B3.2      |                                   | 860.4                      | 9.1                                                                    | 22.0                                 | 39.1           | 11.0                       | 35.6         | 75                   | 170                          |
| B4     | B4.1      |                                   | 26.44                      | 9.1                                                                    | 22.0                                 | 1.2            | 11.0                       | 1.1          | 2                    | 173                          |
| B6     | B6.1      |                                   | 294.08                     | 9.1                                                                    | 22.0                                 | 13.4           | 11.0                       | 12.2         | 26                   | 198                          |
| B7     | B7.1      |                                   | 250                        | 2.5                                                                    | 80.0                                 | 3.1            | 40.0                       | 2.8          | 6                    | 204                          |
| B8     | B8.1      |                                   | 870.68                     | 9.1                                                                    | 22.0                                 | 39.6           | 11.0                       | 36.0         | 76                   | 280                          |
| B9     | B9.1      |                                   | 155.28                     | 16.8                                                                   | 11.9                                 | 13.0           | 6.0                        | 11.9         | 25                   | 305                          |
|        | B9.2      |                                   | 31.76                      | 16.8                                                                   | 11.9                                 | 2.7            | 6.0                        | 2.4          | 5                    | 310                          |
| C1     | C1.1      |                                   | 15                         | 2.5                                                                    | 80.0                                 | 0.2            | 40.0                       | 0.2          | 0                    | 310                          |
| E1     | E1.1      |                                   | 1600                       | 2.5                                                                    | 80.0                                 | 20.0           | 40.0                       | 18.2         | 38                   | 348                          |
|        | E1.2      | 1                                 | 930.68                     | 3.0303                                                                 | 66.0                                 | 14.1           | 33.0                       | 12.8         | 27                   | 375                          |
|        | E1.3      | 1                                 | 648.16                     | 3.0303                                                                 | 66.0                                 | 9.8            | 33.0                       | 8.9          | 19                   | 394                          |
|        | E1.4      | 1                                 | 5625.72                    | 3.0303                                                                 | 66.0                                 | 85.2           | 33.0                       | 77.5         | 163                  | 557                          |
| E2     | E2.1      |                                   | 125.4                      | 9.1                                                                    | 22.0                                 | 5.7            | 11.0                       | 5.2          | 11                   | 567                          |
|        | E2.2      |                                   | 38.76                      | 2.5                                                                    | 80.0                                 | 0.5            | 40.0                       | 0.4          | 1                    | 568                          |
| E3     | E3.1      |                                   | 301                        | 9.1                                                                    | 22.0                                 | 13.7           | 11.0                       | 12.5         | 26                   | 595                          |
|        | E3.2      |                                   | 322.32                     | 9.1                                                                    | 22.0                                 | 14.7           | 11.0                       | 13.3         | 28                   | 623                          |
| E4     | E4.1      |                                   | 1513.2                     | 16.8                                                                   | 11.9                                 | 127.1          | 6.0                        | 115.6        | 243                  | 865                          |
|        | E4.2      |                                   | 1469.36                    | 16.8                                                                   | 11.9                                 | 123.4          | 6.0                        | 112.2        | 236                  | 1101                         |
| F1     | F1.2      | 1                                 | 200                        | 0.8325                                                                 | 240.2                                | 0.8            | 120.1                      | 0.8          | 2                    | 1102                         |
| F2     | F2.1      |                                   | 133.08                     | 2.5                                                                    | 80.0                                 | 1.7            | 40.0                       | 1.5          | 3                    | 1106                         |
| F3     | F3.1      |                                   | 549                        | 9.1                                                                    | 22.0                                 | 25.0           | 11.0                       | 22.7         | 48                   | 1153                         |
|        | F3.2      |                                   | 109.36                     | 16.8                                                                   | 11.9                                 | 9.2            | 6.0                        | 8.4          | 18                   | 1171                         |
|        | F3.3      | 1                                 | 302.56                     | 5.5944                                                                 | 35.8                                 | 8.5            | 17.9                       | 7.7          | 16                   | 1187                         |
| F5     | F5.1      |                                   | 200                        | 9.1                                                                    | 22.0                                 | 9.1            | 11.0                       | 8.3          | 17                   | 1204                         |
| H1     | H1.1      |                                   | 170.36                     | 2.5                                                                    | 80.0                                 | 2.1            | 40.0                       | 1.9          | 4                    | 1208                         |
| H3     | H3.2      |                                   | 31.24                      | 16.8                                                                   | 11.9                                 | 2.6            | 6.0                        | 2.4          | 5                    | 1213                         |
| I1     | I1.1      |                                   | 17.6                       | 16.8                                                                   | 11.9                                 | 1.5            | 6.0                        | 1.3          | 3                    | 1216                         |
| I3     | I3.1      |                                   | 74.12                      | 16.8                                                                   | 11.9                                 | 6.2            | 6.0                        | 5.7          | 12                   | 1228                         |
|        | I3.2      |                                   | 104.396                    | 16.8                                                                   | 11.9                                 | 8.8            | 6.0                        | 8.0          | 17                   | 1245                         |
|        | I3.3      |                                   | 101.88                     | 16.8                                                                   | 11.9                                 | 8.6            | 6.0                        | 7.8          | 16                   | 1261                         |
| I4     | I4.1      |                                   | 3.84                       | 16.8                                                                   | 11.9                                 | 0.3            | 6.0                        | 0.3          | 1                    | 1262                         |
|        | I4.2      |                                   | 0.52                       | 16.8                                                                   | 11.9                                 | 0.0            | 6.0                        | 0.0          | 0                    | 1262                         |
| J1     | J1.1      |                                   | 299.2                      | 9.1                                                                    | 22.0                                 | 13.6           | 11.0                       | 12.4         | 26                   | 1288                         |
|        | J1.2      |                                   | 239.8                      | 16.8                                                                   | 11.9                                 | 20.1           | 6.0                        | 18.3         | 38                   | 1326                         |
| J2     | J2.1      |                                   | 777.6                      | 16.8                                                                   | 11.9                                 | 65.3           | 6.0                        | 59.4         | 125                  | 1451                         |
|        | J2.2      |                                   | 390.6                      | 16.8                                                                   | 11.9                                 | 32.8           | 6.0                        | 29.8         | 63                   | 1514                         |
| J3     | J3.1      |                                   | 71.52                      | 16.8                                                                   | 11.9                                 | 6.0            | 6.0                        | 5.5          | 11                   | 1525                         |
|        | J3.2      |                                   | 80.72                      | 16.8                                                                   | 11.9                                 | 6.8            | 6.0                        | 6.2          | 13                   | 1538                         |
| K1     | K1.1      |                                   | 652.6                      | 16.8                                                                   | 11.9                                 | 54.8           | 6.0                        | 49.8         | 105                  | 1643                         |
|        | K1.2      |                                   | 326.16                     | 9.1                                                                    | 22.0                                 | 14.8           | 11.0                       | 13.5         | 28                   | 1671                         |
| K2     | K2.1      |                                   | 88.04                      | 16.8                                                                   | 11.9                                 | 7.4            | 6.0                        | 6.7          | 14                   | 1685                         |
|        | K2.2      |                                   | 25.2                       | 9.1                                                                    | 22.0                                 | 1.1            | 11.0                       | 1.0          | 2                    | 1687                         |
| K3     | K3.1      |                                   | 176.4                      | 16.8                                                                   | 11.9                                 | 14.8           | 6.0                        | 13.5         | 28                   | 1716                         |
|        | K3.2      |                                   | 33.44                      | 9.1                                                                    | 22.0                                 | 1.5            | 11.0                       | 1.4          | 3                    | 1719                         |
|        | K3.3      |                                   | 115.16                     | 9.1                                                                    | 22.0                                 | 5.2            | 11.0                       | 4.8          | 10                   | 1729                         |
| K4     | K4.1      |                                   | 165.4                      | 16.8                                                                   | 11.9                                 | 13.9           | 6.0                        | 12.6         | 27                   | 1755                         |
|        | K4.2      |                                   | 0.8                        | 16.8                                                                   | 11.9                                 | 0.1            | 6.0                        | 0.1          | 0                    | 1755                         |
| K5     | K5.1      |                                   | 48.36                      | 9.1                                                                    | 22.0                                 | 2.2            | 11.0                       | 2.0          | 4                    | 1759                         |

| Region | Subregion | 1, hills<br>2, steep<br>mountains | Area<br>(km <sup>2</sup> ) | Biomass kg       | Area per                             | No.<br>females | Area per                 | No.<br>males | Total<br>territories | Running<br>total<br>(adults) |
|--------|-----------|-----------------------------------|----------------------------|------------------|--------------------------------------|----------------|--------------------------|--------------|----------------------|------------------------------|
|        |           |                                   |                            | km <sup>-2</sup> | by habitat<br>quality<br>and terrain |                | 200 kg<br>female<br>(km) |              |                      |                              |
| L1     | L1.1      |                                   | 1423.8                     | 16.8             | 11.9                                 | 119.6          | 6.0                      | 108.7        | 228                  | 1988                         |
|        | L1.2      |                                   | 393.64                     | 16.8             | 11.9                                 | 33.1           | 6.0                      | 30.1         | 63                   | 2051                         |
|        | L1.3      |                                   | 258.08                     | 9.1              | 22.0                                 | 11.7           | 11.0                     | 10.7         | 22                   | 2073                         |
| L2     | L2.1      |                                   | 73.32                      | 9.1              | 22.0                                 | 3.3            | 11.0                     | 3.0          | 6                    | 2080                         |
|        | L2.2      |                                   | 25.12                      | 16.8             | 11.9                                 | 2.1            | 6.0                      | 1.9          | 4                    | 2084                         |
| L3     | L3.1      |                                   | 691.88                     | 9.1              | 22.0                                 | 31.5           | 11.0                     | 28.6         | 60                   | 2144                         |
|        | L3.2      |                                   | 465.44                     | 16.8             | 11.9                                 | 39.1           | 6.0                      | 35.5         | 75                   | 2218                         |
| L4     | L4.1      |                                   | 4082.08                    | 9.1              | 22.0                                 | 185.7          | 11.0                     | 168.8        | 355                  | 2573                         |
| L5     | L5.1      |                                   | 590.36                     | 16.8             | 11.9                                 | 49.6           | 6.0                      | 45.1         | 95                   | 2668                         |
|        | L5.2      |                                   | 22.96                      | 16.8             | 11.9                                 | 1.9            | 6.0                      | 1.8          | 4                    | 2671                         |
| M1     | M1.1      |                                   | 928.12                     | 16.8             | 11.9                                 | 78.0           | 6.0                      | 70.9         | 149                  | 2820                         |
| M2     | M2.1      |                                   | 466.24                     | 16.8             | 11.9                                 | 39.2           | 6.0                      | 35.6         | 75                   | 2895                         |
|        | M2.2      |                                   | 168.56                     | 9.1              | 22.0                                 | 7.7            | 11.0                     | 7.0          | 15                   | 2910                         |
|        | M2.3      |                                   | 143.88                     | 9.1              | 22.0                                 | 6.5            | 11.0                     | 6.0          | 12                   | 2922                         |
| M3     | M3.1      |                                   | 0.48                       | 16.8             | 11.9                                 | 0.0            | 6.0                      | 0.0          | 0                    | 2922                         |
|        | M3.2      |                                   | 4.08                       | 9.1              | 22.0                                 | 0.2            | 11.0                     | 0.2          | 0                    | 2923                         |
| M4     | M4.1      |                                   | 575.12                     | 2.5              | 80.0                                 | 7.2            | 40.0                     | 6.5          | 14                   | 2936                         |
| N1     | N1.1      |                                   | 2271.96                    | 16.8             | 11.9                                 | 190.8          | 6.0                      | 173.5        | 364                  | 3301                         |
|        | N1.2      |                                   | 1776.84                    | 16.8             | 11.9                                 | 149.3          | 6.0                      | 135.7        | 285                  | 3586                         |
| N2     | N2.1      |                                   | 3679.08                    | 16.8             | 11.9                                 | 309.0          | 6.0                      | 280.9        | 590                  | 4176                         |
|        | N2.2      |                                   | 1199.44                    | 16.8             | 11.9                                 | 100.8          | 6.0                      | 91.6         | 192                  | 4368                         |
| N3     | N3.1      |                                   | 4638.24                    | 9.1              | 22.0                                 | 211.0          | 11.0                     | 191.9        | 403                  | 4771                         |
|        | N3.2      |                                   | 169.44                     | 9.1              | 22.0                                 | 7.7            | 11.0                     | 7.0          | 15                   | 4786                         |
|        | N3.3      |                                   | 1246.6                     | 9.1              | 22.0                                 | 56.7           | 11.0                     | 51.6         | 108                  | 4894                         |
| N4     | N4.1      |                                   | 2429.52                    | 9.1              | 22.0                                 | 110.5          | 11.0                     | 100.5        | 211                  | 5105                         |
| N5     | N5.1      |                                   | 1414.36                    | 9.1              | 22.0                                 | 64.4           | 11.0                     | 58.5         | 123                  | 5228                         |
|        | N5.2      |                                   | 251.12                     | 16.8             | 11.9                                 | 21.1           | 6.0                      | 19.2         | 40                   | 5268                         |
| N6     | N6.1      |                                   | 759.52                     | 16.8             | 11.9                                 | 63.8           | 6.0                      | 58.0         | 122                  | 5390                         |
|        | N6.2      |                                   | 189.72                     | 16.8             | 11.9                                 | 15.9           | 6.0                      | 14.5         | 30                   | 5420                         |
| N7     | N7.1      |                                   | 122.72                     | 9.1              | 22.0                                 | 5.6            | 11.0                     | 5.1          | 11                   | 5431                         |
| N8     | N8.1      |                                   | 348.88                     | 9.1              | 22.0                                 | 15.9           | 11.0                     | 14.4         | 30                   | 5461                         |
|        | N8.2      |                                   | 43.84                      | 9.1              | 22.0                                 | 2.0            | 11.0                     | 1.8          | 4                    | 5465                         |
| O1     | O1.1      |                                   | 1047.44                    | 9.1              | 22.0                                 | 47.7           | 11.0                     | 43.3         | 91                   | 5556                         |
|        | O1.2      |                                   | 337.16                     | 16.8             | 11.9                                 | 28.3           | 6.0                      | 25.7         | 54                   | 5610                         |
|        | O1.3      |                                   | 209.88                     | 9.1              | 22.0                                 | 9.5            | 11.0                     | 8.7          | 18                   | 5628                         |
|        | O1.4      |                                   | 3463.08                    | 9.1              | 22.0                                 | 157.6          | 11.0                     | 143.2        | 301                  | 5929                         |
| O2     | O2.1      | 1                                 | 1610.44                    | 3.0303           | 66.0                                 | 24.4           | 33.0                     | 22.2         | 47                   | 5976                         |
|        | O2.2      |                                   | 173.8                      | 2.5              | 80.0                                 | 2.2            | 40.0                     | 2.0          | 4                    | 5980                         |
|        | O2.3      | 2                                 | 2944.56                    | 1.516697         | 131.9                                | 22.3           | 65.9                     | 20.3         | 43                   | 6022                         |
| O3     | O3.1      |                                   | 709.2                      | 9.1              | 22.0                                 | 32.3           | 11.0                     | 29.3         | 62                   | 6084                         |
|        | O3.2      |                                   | 52.76                      | 2.5              | 80.0                                 | 0.7            | 40.0                     | 0.6          | 1                    | 6085                         |
|        | O3.3      |                                   | 128                        | 2.5              | 80.0                                 | 1.6            | 40.0                     | 1.5          | 3                    | 6088                         |
| O4     | O4.1      | 1                                 | 947.64                     | 0.8325           | 240.2                                | 3.9            | 120.1                    | 3.6          | 8                    | 6096                         |
|        | O4.2      |                                   | 493.16                     | 2.5              | 80.0                                 | 6.2            | 40.0                     | 5.6          | 12                   | 6108                         |
| O5     | O5.1      |                                   | 307.48                     | 2.5              | 80.0                                 | 3.8            | 40.0                     | 3.5          | 7                    | 6115                         |
| P1     | P1.1      | 2                                 | 2035                       | 0.416675         | 480.0                                | 4.2            | 240.0                    | 3.9          | 8                    | 6123                         |
|        | P1.2      | 2                                 | 9525                       | 1.516697         | 131.9                                | 72.2           | 65.9                     | 65.7         | 138                  | 6261                         |
| P2     | P2.1      | 2                                 | 1714                       | 1.516697         | 131.9                                | 13.0           | 65.9                     | 11.8         | 25                   | 6286                         |
| P3     | P3.1      | 2                                 | 3228.64                    | 0.416675         | 480.0                                | 6.7            | 240.0                    | 6.1          | 13                   | 6299                         |
|        | P3.2      |                                   | 360.72                     | 2.5              | 80.0                                 | 4.5            | 40.0                     | 4.1          | 9                    | 6307                         |
| P5     | P5.1      | 2                                 | 3033.68                    | 1.516697         | 131.9                                | 23.0           | 65.9                     | 20.9         | 44                   | 6351                         |
|        | P5.2      |                                   | 1883.8                     | 2.5              | 80.0                                 | 23.5           | 40.0                     | 21.4         | 45                   | 6396                         |
| P6     | P6.1      | 2                                 | 381.6                      | 0.416675         | 480.0                                | 0.8            | 240.0                    | 0.7          | 2                    | 6398                         |
|        | P6.2      | 2                                 | 3637.32                    | 1.516697         | 131.9                                | 27.6           | 65.9                     | 25.1         | 53                   | 6450                         |

| Region | Subregion | 1, hills<br>2, steep<br>mountains | Area<br>(km <sup>2</sup> ) | Biomass kg<br>km <sup>-2</sup><br>by habitat<br>quality<br>and terrain | Area per<br>200 kg<br>female<br>(km) | No.<br>females | Area per<br>100 kg<br>male | No.<br>males | Total<br>territories | Running<br>total<br>(adults) |
|--------|-----------|-----------------------------------|----------------------------|------------------------------------------------------------------------|--------------------------------------|----------------|----------------------------|--------------|----------------------|------------------------------|
| Q1     | Q1.1      | 2                                 | 6549.32                    | 1.516697                                                               | 131.9                                | 49.7           | 65.9                       | 45.2         | 95                   | 6545                         |
|        | Q1.2      | 2                                 | 2533.52                    | 1.516697                                                               | 131.9                                | 19.2           | 65.9                       | 17.5         | 37                   | 6582                         |
| Q2     | Q2.1      | 2                                 | 4075.32                    | 1.516697                                                               | 131.9                                | 30.9           | 65.9                       | 28.1         | 59                   | 6641                         |
|        | Q2.2      | 2                                 | 2357.4                     | 1.516697                                                               | 131.9                                | 17.9           | 65.9                       | 16.3         | 34                   | 6675                         |
| Q3     | Q3.1      | 2                                 | 849                        | 1.516697                                                               | 131.9                                | 6.4            | 65.9                       | 5.9          | 12                   | 6687                         |
|        | Q3.2      |                                   | 530.08                     | 9.1                                                                    | 22.0                                 | 24.1           | 11.0                       | 21.9         | 46                   | 6733                         |
|        | Q3.3      |                                   | 2891.56                    | 9.1                                                                    | 22.0                                 | 131.6          | 11.0                       | 119.6        | 251                  | 6984                         |
| Q4     | Q4.1      |                                   | 4772.8                     | 9.1                                                                    | 22.0                                 | 217.2          | 11.0                       | 197.4        | 415                  | 7399                         |
|        | Q4.2      |                                   | 4646.36                    | 9.1                                                                    | 22.0                                 | 211.4          | 11.0                       | 192.2        | 404                  | 7803                         |
|        | Q4.3      |                                   | 3548.04                    | 9.1                                                                    | 22.0                                 | 161.4          | 11.0                       | 146.8        | 308                  | 8111                         |
| R1     | R1.1      | 2                                 | 6498.52                    | 1.516697                                                               | 131.9                                | 49.3           | 65.9                       | 44.8         | 94                   | 8205                         |
|        | R1.2      | 2                                 | 3461.8                     | 1.516697                                                               | 131.9                                | 26.3           | 65.9                       | 23.9         | 50                   | 8255                         |
| R2     | R2.1      | 2                                 | 4050.48                    | 0.416675                                                               | 480.0                                | 8.4            | 240.0                      | 7.7          | 16                   | 8271                         |
|        | R2.2      | 2                                 | 5514.84                    | 0.416675                                                               | 480.0                                | 11.5           | 240.0                      | 10.4         | 22                   | 8293                         |
| S1     | S1.1      | 1                                 | 37.56                      | 0.8325                                                                 | 240.2                                | 0.2            | 120.1                      | 0.1          | 0                    | 8293                         |
| S2     | S2.1      | 1                                 | 121.44                     | 0.8325                                                                 | 240.2                                | 0.5            | 120.1                      | 0.5          | 1                    | 8294                         |
|        | S2.2      | 1                                 | 48.4                       | 0.8325                                                                 | 240.2                                | 0.2            | 120.1                      | 0.2          | 0                    | 8295                         |
| S3     | S3.1      | 1                                 | 127.84                     | 0.8325                                                                 | 240.2                                | 0.5            | 120.1                      | 0.5          | 1                    | 8296                         |
