# Supplementary material
Source: PubMed Central journal article supplement (PMC3977255)
Supplement: 1314972111_sd03.pdf [file 1314972111_sd03.pdf]

**Dataset S3:** Ecological estimate of population size of *Dinornis robustus* (South Island only), revised from values for North and South Islands together given in Holdaway & Jacomb (2000). “Raw” values are as calculated for the three taxa of *Dinornis* as recognised in 2000 (“DIST” = *D. struthoides*; “DINO” = *D. novaezealandiae*; “DIGI” = *D. giganteus*), for both islands, for the habitat areas (I-VI, as defined in Holdaway & Jacomb 2000), using the upper range of biomass carrying capacity used by Anderson (1989), and standard body masses for the three “taxa”. “Adjusted occurrences – Both islands” applies the same body masses and biomass carrying capacities to the same habitat areas but recognises the presence of a single taxon (North Island, *D. novaezealandiae*; South Island, *D. robustus*) in each island, with “DIGI” and “DINO” being habitat size morphs of the females, occupying different habitats, and “DIST” of the males, occupying all habitats. “Adjusted occurrences – South Island” gives the population sizes of *D. robustus* predicted for habitat areas I-VI, and South Island total for comparison with estimates based on habitat information in Leathwick et al. (2002; 2003). Worst, medium, best: broad habitat qualities, as defined in Anderson (1989).

| RAW                   |      |                 | Birds km <sup>-2</sup> (Upper range) |        |        |        |        |        |       | Published total | Difference<br>(= other taxa) |
|-----------------------|------|-----------------|--------------------------------------|--------|--------|--------|--------|--------|-------|-----------------|------------------------------|
| BOTH ISLANDS          |      |                 | 100 kg                               | 150 kg | 200 kg | Totals |        |        | Total |                 |                              |
| Quality               | Area | km <sup>2</sup> | “DIST”                               | “DINO” | “DIGI” | “DIST” | “DINO” | “DIGI” |       |                 |                              |
| Medium                | I    | 130000          | 0.091                                | 0.061  | 0.046  | 11830  | 7930   | 5980   | 25740 | 48025           | 22285                        |
| Best                  | II   | 20600           | 0.168                                | 0.112  | 0.084  | 3461   | 2307   | 1730   | 7498  | 31724           | 24226                        |
| Worst                 | III  | 52200           | 0.025                                | 0.017  | 0.0125 | 1305   | 887    | 652.5  | 2845  | 7621            | 4776                         |
| Medium                | IV   | 12500           | 0.091                                | 0.061  | 0.046  | 1138   | 763    | 575    | 2475  | 6650            | 4175                         |
| Best                  | V    | 64400           | 0.168                                | 0.112  | 0.084  | 10819  | 7213   | 5410   | 23442 | 56672           | 33230                        |
| Worst                 | VI   | 6200            |                                      |        |        |        |        |        |       |                 |                              |
|                       |      |                 |                                      |        |        |        |        |        | 62000 | 150692          | 88692                        |
| ADJUSTED OCCURRENCES* |      |                 | Birds km <sup>-2</sup> (Upper range) |        |        |        |        |        |       | Published total | Difference<br>(= other taxa) |
| BOTH ISLANDS          |      |                 | 100 kg                               | 150 kg | 200 kg | Totals |        |        | Total |                 |                              |
| Quality               | Area | km <sup>2</sup> | “DIST”                               | “DINO” | “DIGI” | “DIST” | “DINO” | “DIGI” |       |                 |                              |
| Medium                | I    | 130000          | 0.091                                | 0.061  |        | 11830  | 7930   | 0      | 19760 | 48025           | 28265                        |
| Best                  | II   | 20600           | 0.168                                |        | 0.084  | 3461   | 0      | 1730   | 5191  | 31724           | 26533                        |
| Worst                 | III  | 52200           | 0.025                                | 0.017  |        | 1305   | 887    | 0      | 2192  | 7621            | 5429                         |
| Medium                | IV   | 12500           | 0.091                                | 0.061  |        | 1138   | 763    | 0      | 1900  | 6650            | 4750                         |
| Best                  | V    | 64400           | 0.168                                |        | 0.084  | 10819  | 0      | 5410   | 16229 | 56672           | 40443                        |
| Worst                 | VI   | 6200            |                                      |        |        |        |        |        | 0     |                 |                              |
|                       |      |                 |                                      |        |        |        |        |        | 45272 | 150692          | 105420                       |
| ADJUSTED OCCURRENCES* |      |                 | Birds km <sup>-2</sup> (Upper range) |        |        |        |        |        |       | Published total | Difference<br>(= other taxa) |
| SOUTH ISLAND          |      |                 | 100 kg                               | 150 kg | 200 kg | Totals |        |        | Total |                 |                              |
| Quality               | Area | km <sup>2</sup> | “DIST”                               | “DINO” | “DIGI” | “DIST” | “DINO” | “DIGI” |       |                 |                              |
| Medium                | I    | 26000           | 0.091                                | 0.061  |        | 2366   | 1586   | 0      | 3952  |                 |                              |
| Best                  | II   | 2060            | 0.168                                |        | 0.084  | 346    | 0      | 173    | 519   |                 |                              |
| Worst                 | III  | 41760           | 0.025                                | 0.017  |        | 1044   | 710    | 0      | 1754  |                 |                              |
| Medium                | IV   | 10000           | 0.091                                | 0.061  |        | 910    | 610    | 0      | 1520  |                 |                              |
| Best                  | V    | 64400           | 0.168                                |        | 0.084  | 10819  | 0      | 5410   | 16229 |                 |                              |
| Worst                 | VI   | 6200            |                                      |        |        |        |        |        | 0     |                 |                              |
|                       |      |                 |                                      |        |        |        |        |        | 23974 |                 |                              |

\*Occurrences taking into account the different - non-sympatric - distributions of the three components of the taxon *Dinornis* that were considered to be separate species in 2000. The adjustments were made to allow quantification of the birds in each island for comparison with results of genetic analyses for the South Island alone, as the estimates in Holdaway & Jacomb (2000) were for both main islands.
